# Supplementary material for: Clinical application of intrathecal gadobutrol for assessment of cerebrospinal fluid tracer clearance to blood
Source: PubMed Central journal article supplement (PMC8262318; doi:10.1172/jci.insight.147063), 2021-05-10
Supplement: jciinsight-6-147063-s206.pdf [file jciinsight-6-147063-s206.pdf]

# Clinical application of intrathecal gadobutrol for assessment of cerebrospinal fluid tracer clearance to blood

**Per Kristian Eide<sup>1,2\*</sup>, Espen Mariussen<sup>3</sup>, Hilde Uggerud<sup>3</sup>, Are H. Pripp<sup>4</sup>, Aslan Lashkarivand<sup>1,2</sup>, Bjørnar Hassel<sup>2,5</sup>, Hege Christensen<sup>6</sup>, Markus Herberg Hovd<sup>6</sup>, Geir Ringstad<sup>7</sup>**

<sup>1</sup>Department of Neurosurgery, Oslo University Hospital – Rikshospitalet, Oslo, Norway.

<sup>2</sup>Institute of Clinical Medicine, Faculty of Medicine, University of Oslo, Oslo, Norway.

<sup>3</sup>Norwegian Institute for Air Research, Kjeller, Norway.

<sup>4</sup>Oslo Centre of Biostatistics and Epidemiology, Research Support Services, Oslo University Hospital, Oslo, Norway.

<sup>5</sup>Department of Neurohabilitation, Oslo University Hospital, Oslo, Norway

<sup>6</sup>Section for Pharmacology and Pharmaceutical Biosciences, Department of Pharmacy, University of Oslo, Oslo, Norway<sup>7</sup>Division of Radiology and Nuclear Medicine, Department of Radiology, Oslo University Hospital - Rikshospitalet, Oslo, Norway.

\*Correspondence:

Professor Per Kristian Eide, MD PhD  
Department of Neurosurgery  
Oslo University Hospital - Rikshospitalet  
Pb 4950 Nydalen,

N-0424 Oslo, Norway

[p.k.eide@medisin.uio.no](mailto:p.k.eide@medisin.uio.no)/[peide@ous-hf.no](mailto:peide@ous-hf.no)

**Supplementary Figure 1. Enrichment of tracer within cisterna magna**

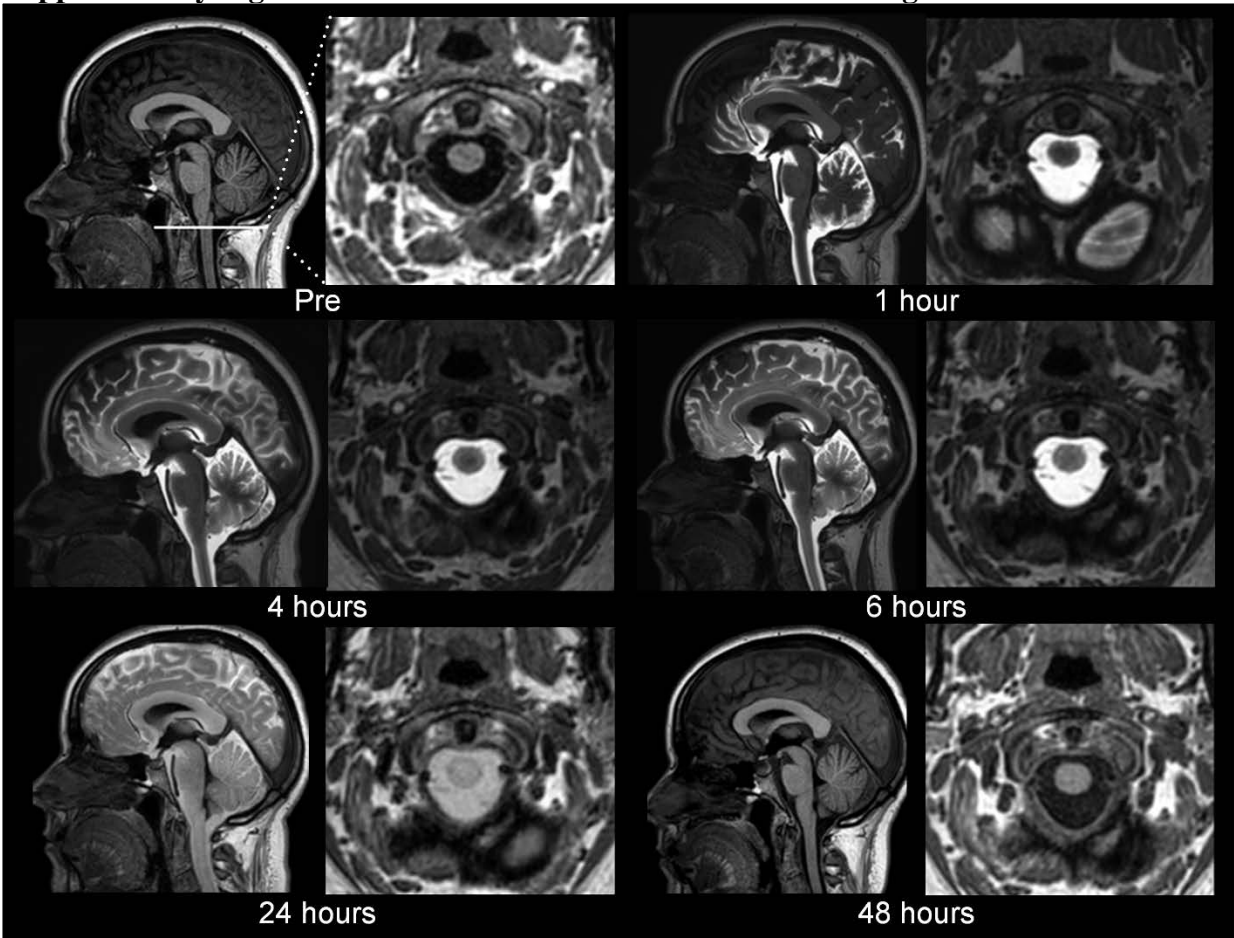

The change in MRI T1 signal within the cisterna magna is shown before (Pre) and 1, 4, 6, 24 and 48 hours after injection of intrathecal gadobutrol in one REF subject

**Supplementary Figure 2. Placement of region of interest within cisterna magna**

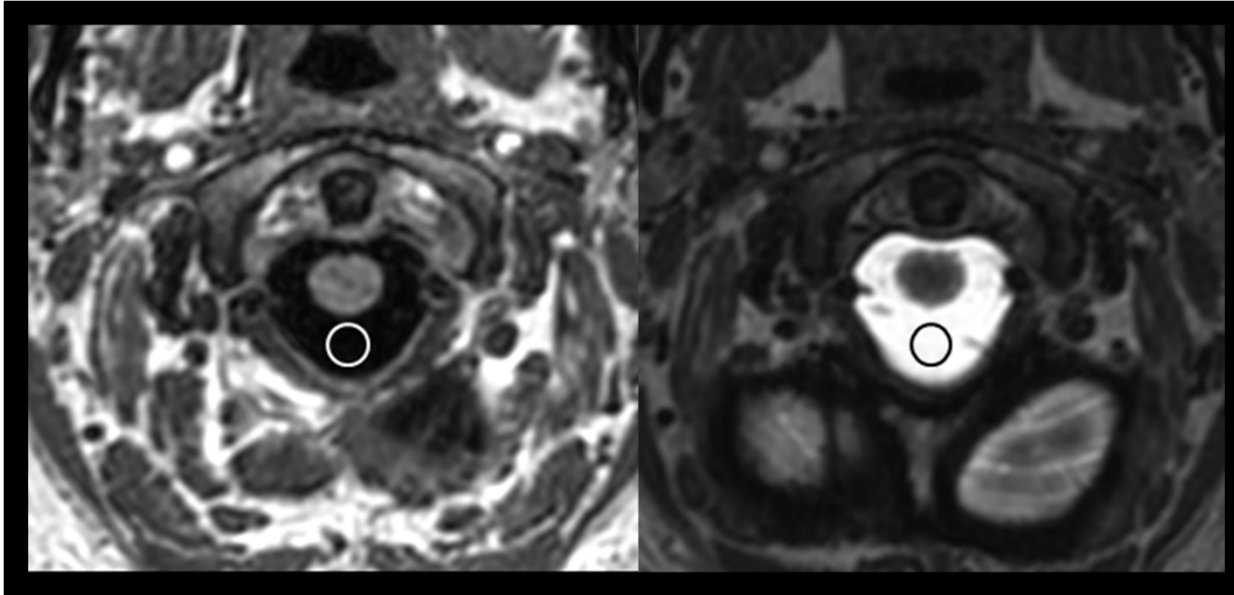

The placement of region of interest (open circle) within the cisterna magna is shown before (left) and 1 after (right) injection of intrathecal gadobutrol.

**Supplementary Figure 3. Change in MRI T1 within sagittal sinus/confluence over time**

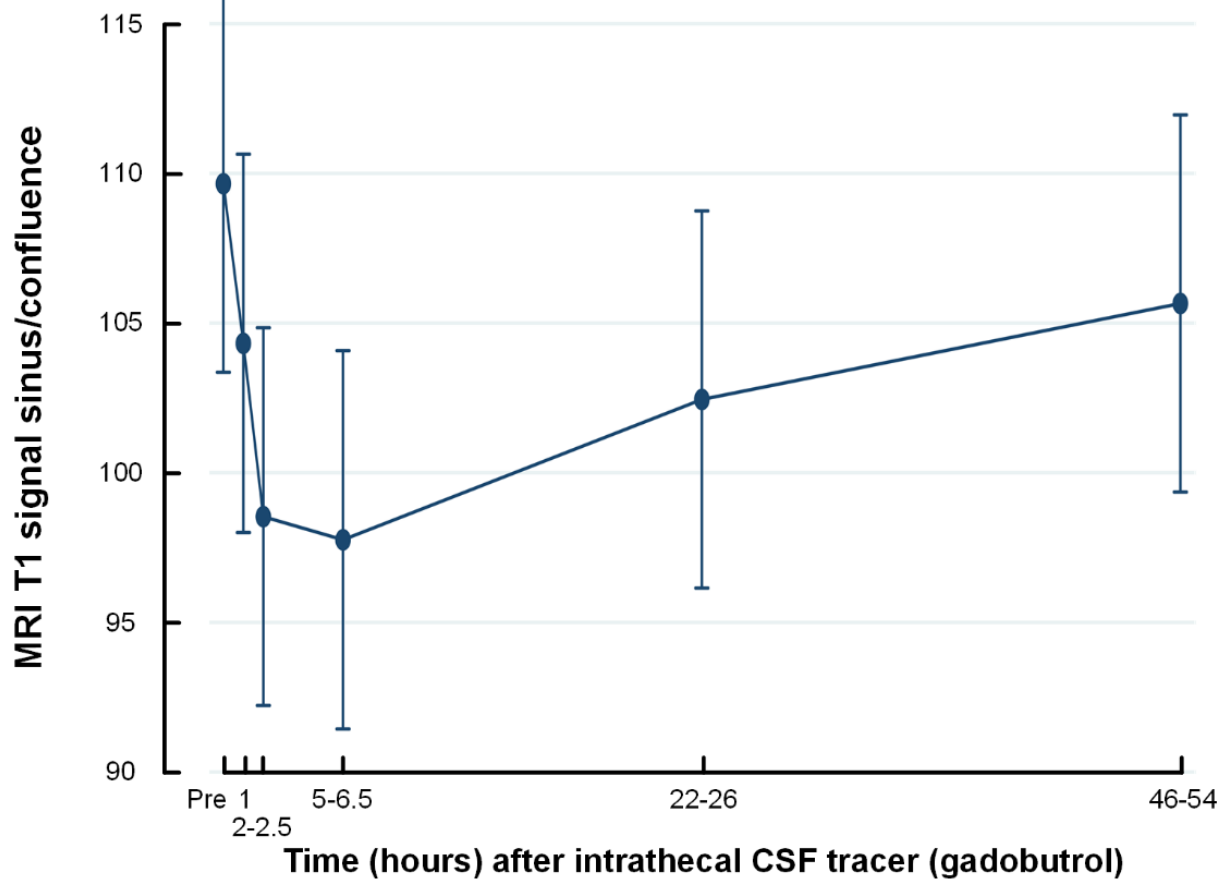

The change in mean MRI T1 signal within the sagittal sinus/confluence before (Pre) and 1, 2-2.5, 5-6.5, 22-26 and 46-54 after injection of intrathecal gadobutrol. Bars represented by standard error. Provided gadobutrol enriched blood, a T1 signal increase would be expected, which is not seen. The trend plot does not indicate enrichment of tracer within the sagittal sinus/confluence.

**Suppl Table 1. Age-adjusted differences in CSF tracer enrichment between REF patients and patients with CSF disturbances**

|                              | 1 hr       |         | 2-2.5 hrs  |         | 4-5 hrs    |         | 5-6.5 hrs  |         | 22-26 hrs  |         | 46-54 hrs  |         |
|------------------------------|------------|---------|------------|---------|------------|---------|------------|---------|------------|---------|------------|---------|
|                              | Mean±SE    | P-value | Mean±SE    | P-value | Mean±SE    | P-value | Mean±SE    | P-value | Mean±SE    | P-value | Mean±SE    | P-value |
| Diff SIH - REF               | -16 ± 651  | 0.980   | 250 ± 1042 | 0.810   | -640 ± 707 | 0.366   | -886 ± 651 | 0.174   | -433 ± 650 | 0.505   | -227 ± 602 | 0.706   |
| Age-adjusted Diff SIH - REF  | -37 ± 667  | 0.956   | 232 ± 1050 | 0.825   | -662 ± 725 | 0.362   | -906 ± 668 | 0.175   | -453 ± 666 | 0.496   | -248 ± 619 | 0.689   |
| P-value of age               |            | 0.889   |            | 0.889   |            | 0.889   |            | 0.889   |            | 0.889   |            | 0.889   |
| Diff iNPH - REF              | 2005 ± 600 | 0.001   | 1620 ± 599 | 0.007   | 477 ± 601  | 0.428   | 1294 ± 617 | 0.036   | 1150 ± 598 | 0.055   | 858 ± 641  | 0.181   |
| Age-adjusted Diff iNPH - REF | 1906 ± 827 | 0.021   | 1520 ± 827 | 0.066   | 377 ± 827  | 0.649   | 1193 ± 842 | 0.156   | 1050 ± 826 | 0.204   | 758 ± 858  | 0.377   |
| P-value of age               |            | 0.861   |            | 0.861   |            | 0.861   |            | 0.861   |            | 0.861   |            | 0.861   |
| Diff PC - REF                | 1496 ± 499 | 0.003   | 1201 ± 498 | 0.016   | 600 ± 530  | 0.257   | 390 ± 512  | 0.446   | -269 ± 497 | 0.589   | -99 ± 514  | 0.848   |
| Age-adjusted Diff PC - REF   | 1399 ± 510 | 0.006   | 1105 ± 509 | 0.030   | 505 ± 540  | 0.350   | 294 ± 523  | 0.573   | -365 ± 508 | 0.472   | -195 ± 526 | 0.711   |
| P-value of age               |            | 0.415   |            | 0.415   |            | 0.415   |            | 0.415   |            | 0.415   |            | 0.415   |
| Diff IIH - REF               | 3346 ± 710 | 0.001   | 730 ± 801  | 0.362   | 454 ± 804  | 0.572   | 911 ± 802  | 0.256   | 57 ± 707   | 0.936   | -149 ± 208 | 0.472   |
| *Age-adjusted Diff IIH - REF | -          | -       | -          | -       | -          | -       | -          | -       | -          | -       | -          | -       |
| P-value of age               |            |         |            |         |            |         |            |         |            |         |            |         |

\*Age-adjusted differences between IIH and REF subjects could not be determined due to low number of observations.

**Suppl Table 2. Age-adjusted differences in blood concentrations of CSF tracer between REF patients and patients with CSF disturbances**

|                 | 1 hr         |         | 2-2.5 hrs    |         | 4-5 hrs      |         | 5-6.5 hrs    |         | 22-26 hrs    |         | 46-54 hrs     |         |
|-----------------|--------------|---------|--------------|---------|--------------|---------|--------------|---------|--------------|---------|---------------|---------|
|                 | Mean±SE      | P-value | Mean±SE      | P-value | Mean±SE      | P-value | Mean±SE      | P-value | Mean±SE      | P-value | Mean±SE       | P-value |
| Diff SIH - REF  | 1.51 ± 0.42  | <0.001  | 1.48 ± 0.48  | 0.002   | 1.91 ± 0.57  | 0.001   | 1.45 ± 0.58  | 0.012   | 0.23 ± 0.42  | 0.58    | -0.05 ± 0.05  | 0.37    |
| Age-adjusted    | 1.47 ± 0.42  | <0.001  | 1.44 ± 0.48  | 0.003   | 1.86 ± 0.58  | 0.001   | 1.45 ± 0.58  | 0.013   | 0.197 ±      | 0.64    | -0.08 ± 0.05  | 0.09    |
| Diff SIH - REF  |              |         |              |         |              |         |              |         | 0.418        |         |               |         |
| P-value of age  |              | 0.008   |              | 0.008   |              | 0.008   |              | 0.008   |              | 0.008   |               | 0.008   |
| Diff iNPH - REF | -0.21 ± 0.26 | 0.416   | -0.43 ± 0.28 | 0.132   | -0.25 ± 0.25 | 0.306   | -0.29 ± 0.32 | 0.36    | 0.31 ± 0.24  | 0.202   | 0.18 ± 0.06   | 0.004   |
| Age-adjusted    | -0.29 ± 0.27 | 0.27    | -0.50 ± 0.29 | 0.08    | -0.33 ± 0.25 | 0.191   | -0.37 ± 0.32 | 0.25    | 0.23 ± 0.25  | 0.36    | 0.10 ± 0.07   | 0.15    |
| Diff iNPH - REF |              |         |              |         |              |         |              |         |              |         |               |         |
| P-value of age  |              | 0.053   |              | 0.053   |              | 0.053   |              | 0.053   |              | 0.053   |               | 0.053   |
| Diff PC - REF   | -0.11 ± 0.29 | 0.70    | -0.06 ± 0.26 | 0.80    | 0.78 ± 0.31  | 0.012   | 0.93 ± 0.30  | 0.002   | -0.03 ± 0.25 | 0.92    | -0.002 ± 0.05 | 0.97    |
| Age-adjusted    | -0.09 ± 0.29 | 0.76    | -0.03 ± 0.26 | 0.90    | 0.80 ± 0.31  | 0.010   | 0.96 ± 0.30  | 0.001   | 0.002 ± 0.26 | 0.93    | 0.014 ± 0.045 | 0.76    |
| Diff PC - REF   |              |         |              |         |              |         |              |         |              |         |               |         |
| P-value of age  |              | 0.009   |              | 0.009   |              | 0.009   |              | 0.009   |              | 0.009   |               | 0.009   |
| Diff IIH - REF  | 0.08 ± 0.34  | 0.80    | 0.14 ± 0.46  | 0.77    | 0.22 ± 0.39  | 0.572   | -0.30 ± 0.65 | 0.64    | 0.19 ± 0.46  | 0.69    | 0.29 ± 0.10   | 0.004   |
| Age-adjusted    | 0.12 ± 0.34  | 0.739   | 0.16 ± 0.47  | 0.733   | 0.25 ± 0.39  | 0.522   | -0.29 ± 0.65 | 0.656   | 0.21 ± 0.47  | 0.656   | 0.32 ± 0.09   | <0.001  |
| Diff IIH - REF  |              |         |              |         |              |         |              |         |              |         |               |         |
| P-value of age  |              | 0.029   |              | 0.029   |              | 0.029   |              | 0.029   |              | 0.029   |               | 0.029   |
